## Title Page

# **Novel Alzheimer risk genes determine the microglia response to amyloid- $\beta$ but not to TAU pathology**

Annerieke Sierksma, PhD<sup>1,2,3</sup>, Ashley Lu, MSc<sup>1,2,3</sup>, Evgenia Salta, PhD<sup>2,3</sup>, Renzo Mancuso, PhD<sup>2,3</sup>, Jesus Zoco, MSc<sup>2,3</sup>, David Blum, PhD<sup>4</sup>, Prof Luc Buée, PhD<sup>4</sup>, Prof Bart De Strooper, PhD<sup>2,3,5,6</sup>, Mark Fiers, PhD<sup>2,3,6</sup>

## Affiliations

1. These authors contributed equally
2. VIB Center for Brain & Disease Research, Leuven, Belgium
3. KU Leuven, Department of Neurosciences, Leuven research Institute for Neuroscience and Disease (LIND), Leuven, Belgium
4. Université Lille, INSERM, CHU Lille, LabEx DISTALZ, UMR-S 1172, Alzheimer & Tauopathies, Lille, France
5. Dementia Research Institute, ION, University College London, London, UK
6. Senior and corresponding authors

## Contact:

Dr. Mark Fiers & Prof. Bart De Strooper, VIB - Center for Brain & Disease Research, KU Leuven  
- Department of Neurosciences, O&N4, Herestraat 49 box 602 Leuven, Belgium.

E-mail: [mark.fiers@kuleuven.vib.be](mailto:mark.fiers@kuleuven.vib.be); [bart.destrooper@kuleuven.vib.be](mailto:bart.destrooper@kuleuven.vib.be)

## Abstract

**Background:** Thousands of SNPs associated with risk of Alzheimer's disease (AD) in genome-wide association studies (GWAS) do not reach genome-wide significance. When combined, they contribute however to a highly predictive polygenic risk score. The relevance of these subthreshold risk genes to disease, and how their combined predictive power translates into functionally relevant disease pathways, is unknown. We investigate here at the genome-wide level and in an unbiased way to what extent AD risk genes show altered gene expression in the context of increasing A $\beta$  or Tau pathology in mouse models of AD.

**Methods:** We used an existing GWAS data set to generate lists of candidate AD genes at different levels of significance. We performed transcriptomic analysis on wild-type and transgenic APP/PS1 (APPtg) and Thy-TAU22 (TAUtg) mouse models at early and late stage of disease. We used unbiased weighted gene co-expression network analysis (WGCNA) to identify clusters of co-regulated genes responsive to A $\beta$  or TAU pathology. Gene set enrichment was used to identify clusters that were enriched for AD risk genes.

**Findings:** Consistent and significant enrichment of AD risk genes was found in only one out of 63 co-expression modules. This module is highly responsive to A $\beta$  but not to TAU pathology. We identify in this module 18 AD risk genes (p-value=6.5e-11) including 11 new ones, *GPC2*, *TREML2*, *SYK*, *GRN*, *SLC2A5*, *SAMSN1*, *PYDC1*, *HEXB*, *RRBP1*, *LYN* and *BLNK*. All are expressed in microglia, have a binding site for the transcription factor *SPI1* (PU.1), and become significantly upregulated when exposed to A $\beta$ . A subset regulates FC-gamma receptor mediated phagocytosis.

**Interpretation:** Genetic risk of AD is functionally translated into a microglia pathway responsive to A $\beta$  pathology. This insight integrates aspects of the amyloid hypothesis with genetic risk associated to sporadic AD.

## Introduction

Genetic background strongly determines the risk of sporadic Alzheimer's Disease (AD).<sup>1</sup> Apart from the APOE4 polymorphism and 42 other genetic loci, thousands of SNPs associated with risk of AD do not reach genome-wide significance.<sup>2-4</sup> Polygenic risk scores (PRS) incorporate the contribution of these variations and relate that to disease risk.<sup>5</sup> PRSs for AD currently reach a prediction accuracy of 84%.<sup>6</sup> A crucial question is whether AD risk genes functionally link to amyloid- $\beta$  (A $\beta$ ) or TAU pathology or whether they define many parallel pathways that all lead to AD. We considered that at least part of the genes and pathways identified in genome-wide association studies (GWAS) determine the cellular response of the brain to A $\beta$  or TAU pathology.<sup>7</sup> Such a model integrates parts of the amyloid hypothesis with the complex genetics of AD, which could lead to a more coherent view on the pathogenesis of AD.

Profiling of postmortem brain tissue only provides insights into the advanced stages of AD and cannot delineate cause-consequence relationships, which is needed to develop mechanistic models for the pathogenesis of AD. Transgenic mouse models only partially recapitulate AD or frontotemporal dementia (FTD) phenotypes, but they provide functional insights into the initial steps of disease, which is of high relevance for preventative therapeutic interventions.<sup>8</sup> What is lacking until now, however, is integrating the functional information from mouse studies with the GWAS-data obtained in human. By doing so, it might be possible to delineate whether AD risk genes that did not reach genome-wide significance, are involved in the cellular response to A $\beta$  or TAU pathology. This would increase confidence that these genes are truly involved in AD and would indicate in which pathways these genes play a functional role.

Here, we perform transcriptional profiling of mouse hippocampus after exposure to A $\beta$  or TAU pathology, at early (4 months of age (4M)) and mature stages of disease (10M). We used APP<sup>swe</sup>/PS1<sup>L166P</sup> (APPtg) and Thy-TAU22 (TAUtg) mice, both expressing the transgene from a *Thy1-2* promotor.<sup>9,10</sup> APPtg mice develop robust age-dependent transcriptional deregulation, while TAUtg mice have a milder and over time more stable molecular phenotype. AD risk genes uniquely converge

in APPtg mice into a coordinated deregulated multicellular gene network that is strongly enriched in neuroinflammatory functions. Our work provides evidence that a large part of the genetic risk of AD is determining the microglial response to A $\beta$ , and promotes 11 candidate GWAS genes for future AD research.

## Methods

### Mice

The local Ethical Committee of Laboratory Animals of the KU Leuven (governmental license LA1210591, ECD project number P202-2013) approved all animal experiments, following governmental and EU guidelines. APPtg (a.k.a. B6-Cg-Tg(Thy1-APPSw,Thy1-PSEN1\*L166P)21Jckr<sup>9</sup>) mice express *APP<sup>Swe</sup>* and *PSEN1<sup>L166P</sup>* transgenes, while TAUtg (a.k.a. THY-Tau22 or Tg(Thy1-MAPT)22Schd<sup>10</sup>) mice, express the 412 aa isoform of the human 4-repeat *MAPT* gene containing the G272V and P301S mutations. Both mice are made using the *Thy1-2* promoter. Littermate transgenic (TG) and wild-type (WT) male mice were sacrificed at 4 months (average 123.8 days, SD 1.84 days) or 10 months of age (average 299.8 days, SD 2.22 days), creating 8 experimental groups (n=12 per group; see Fig.1A). Number of mice was determined as described in Sierksma et al.<sup>11</sup> Following cervical dislocation, hippocampi were microdissected, snap-frozen in liquid nitrogen and stored at -80°C.

### RNA extraction, library construction, sequencing and mapping

The left hippocampus of each mouse was homogenized in TRIzol (Invitrogen, Carlsbad, CA, USA) using 1ml syringes and 22G/26G needles and purified on mirVana spin columns according to the manufacturer's instructions (Ambion, Austin, TX, USA). RNA purity (260/280 and 260/230 ratios) and integrity was assessed using Nanodrop ND-1000 (Nanodrop Technologies, Wilmington, DE, USA) and Agilent 2100 Bioanalyzer with High Sensitivity chips (Agilent Technologies, Inc., Santa Clara, CA, USA)

and Qubit 3.0 Fluorometer (Life Technologies, Carlsbad, CA, USA), respectively. RNA integrity values of the samples ranged from 7.9 to 9.3 (median= 8.6).

Library preparation and sequencing was performed at the VIB Nucleomics Core (Leuven, Belgium) using 1 µg of total RNA per sample. Poly-A containing mRNA molecules were purified using Illumina TruSeq® Stranded mRNA Sample Prep Kit (protocol version 15031047 Rev.E) and poly-T oligo-attached magnetic beads. After reverse transcription with random primers, different barcodes were introduced to each sample by ligating a single 'A' base to the 3' ends of the blunt-ended cDNA fragments and multiple indexing adapters and 10 cycles of PCR amplification were performed. 96 libraries were pooled and sequenced in 4 runs using NextSeq 500 High75 Output kits on an Illumina NextSeq 500 instrument (Illumina, San Diego, CA, USA). Reads were pre-processed and mapped using BaseSpace SecondaryAnalysis (version 2.4.19.6, [basespace.illumina.com](https://basespace.illumina.com)), filtering out abundant sequences and trimming 2bp from the 5' end. Reads were aligned against the mm10/GRCm38 *Mus musculus* reference genome by Tophat2 (version 2.0.7, <sup>12</sup>).

### Data pre-processing and differential expression analysis

We found in 2 of the 12 APPTg-O mice a 46% lower expression levels of hsa-APPswe, a 26% lower expression of hsa-Psen1L166p and a 24% reduction in mmu-Thy1 gene, which drives the expression of the transgenes (see Supplementary Fig.S1). In the absence of an explanation for this phenomenon, these two mice were excluded from all further analyses.

mRNAs with average raw read counts  $\leq 5$  in 10 out of 96 samples were discarded, leaving 15824 mRNAs for differential expression (DE) analysis. Non-biological variation due to library preparation technicalities (i.e. effects for library prep batch, RNA extraction group and RNA concentration) was removed by the *removeBatchEffect* function from limma package 3.22.7 Bioconductor/R <sup>13</sup>. DE analysis was conducted using a 2-way interaction model (age, genotype, age\*genotype, see Fig.1B; two-sided testing) for APPTg and TAUtg mice separately. To adjust for multiple testing, Benjamini-Yuketieli (BY) p-value adjustment was performed, as we want to control for false discovery rate across experiments

that have partially dependent test statistics, hence the traditional Benjamini-Hochberg adjustment was not applicable<sup>14</sup>. Further differential expression analyses were performed by comparing WT to TG mice at 4M and 10M separately, with BY p-value adjustment across all 4 comparisons. Ranking of genes for Spearman correlations (two-sided testing) was always performed on the basis of signed  $\log_{10}(\text{p-value})$ , i.e. the  $\log_{10}$  of the unadjusted p-value with a positive sign if the LFC of that gene within that comparison was  $>0$  and a negative sign if the LFC was  $<0$ .

### Cell-specific datasets

Cell type specific genes sets for pyramidal neurons (n=701 genes), interneurons (n=364), astrocytes (n=239), microglia (n=435), oligodendrocytes (n=452), endothelial (n=352) and ependymal cells (n=483) were derived from<sup>15</sup>, Supplementary Table 1). Using these gene sets and a count matrix that was z-score normalized across samples, we calculated for each cell type ( $t$ ) the average z-score ( $Z_{tg}$ ) for each experimental group ( $g$ ) and compared this to the respective 4M WT group. We assesses significance using empirically derived p-values (see Supplementary Materials and Methods and Supplementary Fig.S5).

### GWAS gene set enrichment analysis

Human GWAS genes derived from<sup>2</sup> were converted to mouse orthologues using the Ensemble Biomart Release 94<sup>16</sup>. Using the Gene Set Enrichment Analysis Preranked module (Broad Institute<sup>17,18</sup>, two-sided testing) enrichment for GWAS genes was tested among up- and downregulated genes sorted on signed  $\log_{10}(\text{p-value})$  based on the different statistical comparisons (age, genotype and age\*genotype interaction), for APptg and TAUtg separately.

### Weighted gene co-expression network analysis (WGCNA)

The WGCNA package in R<sup>19</sup> was used to build unsigned mRNA coexpression networks for APptg and TAUtg mice separately using all 15824 expressed genes. To generate an adjacency matrix with is the

smallest threshold that satisfies the scale-free topology fit at  $R^2=0.9$ , soft power 3 is used for APPTg and 4 for TAUtg mice, respectively. The topology overlap (TO) was calculated based on the adjacency matrix which measures the network interconnectedness. The topology overlap dissimilarity was then calculated by  $1-TO$  and used as input for average linkage hierarchical clustering. Branches of the hierarchical clustering tree were then assigned into modules using `cutreeHybrid` from the `dynamicTreeCut` package (`deepSplit = 2`, `minModuleSize = 30`,<sup>20</sup>). The resulting 31 APPTg and 32 TAUtg modules were each summarized by the first principal component, known as module eigengenes (MEs). Next, Fisher's Exact test with Benjamini-Yuketieli (BY) p-value adjustment was used to determine if a list of cell type-specific genes overlap significantly with genes in a module. More than half of all modules (APPTg: 16/31; TAUtg: 20/32) show significant overlap with a specific cell type ( $p_{adj}<0.05$ ), particularly with the neuron and interneuron gene sets (APPTg: 10/31; TAUtg: 11/32; see Supplementary Fig.S3+4).

Functional annotations of the modules was performed using first GOrilla<sup>21</sup> and when no significant enrichment could be found, using DAVID (see Supplementary Tables 4 & 5<sup>22,23</sup>). GO categories were deemed significant if the FDR-corrected p-value (GOrilla) or Benjamini-based p-value  $<0.05$  (DAVID).

To search for potential regulators in each module, we ran `i-cisTarget`<sup>24</sup> which predicts transcription factor motifs (position weight matrices) and experimental data tracks (e.g. ENCODE, Roadmap Epigenomics Project) that are enriched in the input set of regions (i.e. genomic regions for each gene within the module). The default setting collected over 23588 features across all the databases available in `i-cisTarget`. Only regulators that were also expressed within the same WGCNA module were considered. Top regulators were selected based on the maximum normalized enrichment score for feature enrichment.

## Gene set overlap assessment

Overlap between the GWAS  $p < 0.001$  gene set ( $n=314$ ), all genes significantly differentially expressed within the APptg age\*genotype interaction comparison ( $n=798$ ), genes within the APptg-Blue module ( $n=4236$ ) and the microglia-specific gene set ( $n=435$ ) were assessed using SuperExactTest<sup>25</sup> (version 1.0.4), which calculates, based on combinatorial theory, the statistical probability of finding an over-representation of genes within the intersection of multiple sets, compared to random expectation. P-values were BY-adjusted (see Supplementary Table 7).

## Data and software availability

All data has been submitted to the GEO database. The mouse mRNAseq data is under accession number GSE110741. The software tools used for this study include: Tophat2 (version 2.0.7,<sup>12</sup>), available from <https://ccb.jhu.edu/software/tophat/index.shtml>; Subread/Featurecounts<sup>26</sup> available from <http://subread.sourceforge.net/>; Pandas Python Data Analysis Library, available from <http://pandas.pydata.org/>; Limma/Linear Models for Microarray Data<sup>27</sup>, available from <https://bioconductor.org/packages/release/bioc/html/limma.html>; Gene Set Enrichment Analysis<sup>17,18</sup>, available from <http://software.broadinstitute.org/gsea/index.jsp>; WGCNA package in R<sup>19</sup>, available from <https://cran.r-project.org/web/packages/WGCNA/index.html>; dynamicTreeCut package<sup>20</sup>, available from <https://cran.r-project.org/web/packages/dynamicTreeCut/index.html>; Gene Ontology enrichment with GOrilla,<sup>21</sup> available from <http://cbl-gorilla.cs.technion.ac.il/> and DAVID<sup>22,23</sup> available from <https://david.ncifcrf.gov/home.jsp>; i-cisTarget<sup>24</sup> available from <https://gbiomed.kuleuven.be/apps/lcb/i-cisTarget/>; SuperExactTest<sup>25</sup> available from <https://cran.r-project.org/web/packages/SuperExactTest/index.html>.



## Results

At 4M of age, APPtg and TAUtg mice are cognitively intact with mild levels of pathology, whereas they display at 10M overlapping profiles of hippocampus-dependent mnemonic deficits and substantial pathology.<sup>9,10,28</sup> mRNAseq was performed on the hippocampus of 4M and 10M APPtg and TAUtg mice (TG) and their respective wild-type (WT) littermates, with n=12 per group and n=96 in total, yielding on average 7.7 million reads per sample (see Fig.1A).

### **Enrichment of AD risk genes is only found in the transcriptomic response of APPtg mice**

A 2x2 linear model (Fig.1B) was employed to investigate the effects of genotype, age, and age\*genotype interaction. The age comparison identifies transcripts changed between 4M and 10M old mice (Fig.2A). The genotype comparison shows mRNAs different between WT and TG mice (Fig.2B). The age\*genotype interaction, finally, assesses which transcripts change with aging uniquely in the TG mice (Fig.2C). The study thus reflects the transcriptional changes manifesting in the mice at two critical time points: initially when the first signs of A $\beta$  and TAU pathology occur and later on, when the biochemical alterations are manifest and accompanied by cognitive deficits.

We wondered whether GWAS-based AD risk genes would be equally responsive to A $\beta$  or TAU pathology. We included both established AD risk genes, i.e. genes with p-value<5x10e-8 in various GWAS studies, as well as subthreshold AD risk genes as these contribute significantly to AD risk predictions through polygenic inheritance.<sup>6</sup> We examined multiple sets of such genes taken from Marioni et al., with decreasing significance and thus larger numbers of genes (see Fig.1C and Supplementary Table 2) and employed gene set enrichment analysis (GSEA) to assess the presence of AD risk genes in the different transcriptional responses of the mice.<sup>2</sup>

The data (Fig.1C) demonstrate that independently of the set size, ranging from 92 genes (p<5e-6) to 1799 genes (p<5e-2), AD risk genes are found consistently, and significantly (padj<1e-250) enriched among the genes changing as APPtg mice age ("APP interaction" Fig.1C), but not in Tautg mice. The

smallest set (n=92 genes with  $p < 5e-06$ ), also significantly enriches among the APPwt vs APPTg comparison ("APP genotype", Fig.1C) ( $\text{padj}=0.0057$ ). This gene set contains many microglia-expressed genes e.g. *Trem12*, *Inpp5d* or *Gal3st4*, (see Fig2B+C). Thus, genes that enhance the risk of developing late-onset AD (LOAD) are clustering among genes that are deregulated over time with increasing A $\beta$ - but not TAU-pathology.

### Changes in gene expression exacerbate with aging in APPTg but not in TAUtg mice

To assess the functional substrate of the AD risk gene enrichment in APPTg mice, we compared the transcriptional deregulation in the two mouse models in more detail (see Fig.2A-C and Supplementary Table 1). The transcriptional response of the APPTg and TAUtg mice caused by aging (i.e. independent of transgene) is practically identical (Spearman correlation  $R=+0.95$ ,  $p=1.3e-29$ , 95% confidence interval (CI)  $+0.91$  to  $+0.97$ ; see Fig.2A). When comparing the effects of transgene expression only, the similarity between APPTg and TAUtg mice becomes rather moderate ( $R=+0.50$ ,  $p=1.1e-19$ , 95% CI= $+0.41$  to  $+0.58$ ; see Fig.2B) and this is only slightly enhanced in the interaction model of age\*genotype ( $R=+0.67$ ,  $p=1e-106$ , 95% CI= $+0.63$  to  $+0.71$ ; see Fig.2C). Thus, while both mouse models age in similar ways, major differences in the transcriptional response between APPTg and TAUtg mice show that these are very different pathologies causing very divergent cellular reactions.

The *APP/PSEN1* transgene causes prominent changes (287 genes in total) in gene expression (green dots, Fig.2B) with most (n=219, i.e. 76%) genes upregulated (log<sub>2</sub>-fold change (LFC): $+0.07$  to  $+5.00$ , Benjamini-Yekutieli adjusted p-value ( $\text{padj}$ ) $<0.05$ ). When the aging component is added (i.e. age\*genotype) even more genes become upregulated (623 mRNAs (i.e.78%), LFC: $+0.12$  to  $+2.98$ ,  $\text{padj}<0.05$ ), while also 175 genes down-regulate their expression (LFC: $-0.67$  to  $-0.08$ ,  $\text{padj}<0.05$ ) (Fig.2C). The many up-regulated genes in APPTg are often involved in microglia (Supplementary Fig.S2) and neuroinflammatory responses, including *Tyrobp* (LFC genotype (G): $+1.19$ , LFC age\*genotype (A\*G): $+1.53$ ), *Cst7* (LFC G: $+5.00$ , LFC A\*G: $+2.62$ ) and *Itgax* (LFC G: $+3.22$ , LFC A\*G: $+2.24$ ). These changes are strong, up to 32-fold. The enriched AD risk genes (Fig.1C) are predominantly upregulated in the

age\*genotype comparison (Fig.2D). Thus, it appears that an increased expression of neuroinflammatory genes, most likely of microglial source, is an early (Fig.2B) and persistent (Fig.2C) component of A $\beta$  pathology and many AD risk genes follow a similar transcriptional response.

TAUtg mice show markedly fewer transcriptional changes with very little aggravation over time. In the genotype comparison (TAUwt vs TAUtg), only 47 genes become significantly up-regulated (LFC:+0.06 to +1.52; padj<0.05) and 77 down-regulated (LFC:-1.30 to -0.05, padj<0.05; Fig.2B, yellow dots). Only 9 genes are up-regulated (LFC:+0.25 to +0.60, padj<0.05; Fig.2C, red dots) when genotype is combined with age in the interaction model. The majority of deregulated genes (62%) in TAUtg vs TAUwt show decreased expression (Fig.2B) and are of neuronal origin (Supplementary Fig.S2). The 9 up-regulated genes in the age\*genotype comparison of TAUtg mice are overlapping with APPTg mice and are of microglial (*C1qa*, *C1qc*, *Tyrobp*, *Ctss*, *Irf8*, *Mpeg1*, *Cst7*, *Rab3il1*) or astroglial (*Gfap*) origin. The overlap with APPTg reflects a (much milder) microglia response in Tautg. With the exception of *Cst7* (LFC: 2.08), the upregulation is indeed very modest (average LFC of 8 others: 0.38) compared to APPTg mice (max LFC: 2.98; average LFC: 0.70). Overall, we can conclude that the molecular pathobiological and cellular responses in APPTg and TAUtg appear fundamentally different. APPTg drives a strong, over time exacerbating inflammatory response, while the Tau transgene causes an early effect on gene expression of genes related to neuronal functions. Most importantly, above threshold and subthreshold significant AD risk genes are transcriptionally active when facing accumulating A $\beta$ , not TAU pathology.

### AD risk genes are co-regulated in a specific functional gene expression module

Next, we performed unbiased weighted gene co-expression network analysis (WGCNA) on each mouse model separately to investigate whether AD risk genes would cluster in functional modules. We obtained in total 63 modules (Supplementary Fig S3+4). GSEA with the GWAS gene set generated by Marioni et al.<sup>2</sup>, at different cut-offs for statistical significance (Fig.3A and Supplementary Table 2) demonstrated that the largest set of risk genes (e.g. n=1799 genes at p<0.05), enrich among 6 APPTg-

and TAUtg-based modules (Turquoise, Red, Blue, Fig.3A). However, when taking gene sets defined by increasing statistical significance ( $p < 0.001$  or smaller), the only module that persistently demonstrates significant enrichment with GWAS genes is the APPTg-Blue module (see Fig.3A), indicating that genes associated with increasing risk of AD, generally cluster within this module.

The APPTg-Blue module is large ( $n=4236$ ), and contains 62% of all the genes significantly differentially expressed in aging APPTg mice (age\*genotype), which are mostly upregulated (Fig.3B+C). This is significantly more than expected by chance alone (log2 odds ratio or LOR: 2.90,  $p=1.54e-158$ ). We functionally characterized this A $\beta$ -induced transcriptional response. The APPTg-Blue module shows a highly significant overlap with the microglia-specific gene set (LOR: 1.90,  $\text{padj}=2.56e-78$ ; Fig.4B and Supplementary Table 3) and to a lesser extent the astrocyte- (LOR: 0.54,  $\text{padj}=0.002$ ) and interneuron-specific gene sets (LOR: 0.37,  $\text{padj}=0.018$ ). Moreover, this module is highly enriched for GO categories involving immune response, cytokine production and inflammation (Fig.3D and Supplementary Table 4). It furthermore shows a highly significant overlap with a recently published A $\beta$ -response network (LOR: 2.0,  $p=2.2e-16$ ) as well as with the microglia-immune module derived from the brains of LOAD patients (LOR: 2.14,  $\text{padj}=8.0e-73$ ), demonstrating that this transcriptional response to increasing A $\beta$  is similar in both A $\beta$  mouse models as well as AD patients.<sup>29,30</sup>

We identified transcription factors potentially regulating this module. Out of 16 APPTg-Blue-associated transcription factors, *Spi1* (a.k.a. PU.1) comes out as the top candidate, which is particularly interesting as a SNP within *Spi1* is protective in AD.<sup>31</sup> *Spi1* is also significantly differentially expressed in the APPTg age\*genotype interaction comparison (LFC: 0.96,  $\text{padj}=9.92e-05$ ). Other transcription factors predicted to regulate the APPTg-Blue module include microglia-related and interferon-responsive transcription factors *Stat2*, *Stat1*, *Ets1* and *Irf7*, although only *Stat1* was significantly differentially expressed in the APPTg age\*genotype comparison (LFC: 0.39,  $\text{padj}=0.0013$ ). To summarize, we can conclude that the APPTg-Blue module shows a coordinated transcriptional response to increasing A $\beta$  load employing a large number of AD risk genes. This cellular response involves microglial, astrocyte and interneuron genes and seems, at least partially, regulated by the transcription factor *Spi1*.

Of note, no such module enriched for AD risk genes is found in the TAUtg mice (see Fig.3A). Several modules show significant overlaps with the microglial, the astrocyte and the pyramidal neuron gene set (see Supplementary Fig.S3+4 and Supplementary Table 3), suggesting that the response to Tau pathology is also multicellular by nature. However, the fragmented cellular response to TAU pathology is clearly different from the coordinated transcriptional regulation response in the APPTg-Blue module.

### **Prioritization of subthreshold GWAS risk genes of AD within the A $\beta$ -induced transcriptional response**

The set of 1799 GWAS genes ( $p < 0.05$ ) contains 439 genes co-regulated within the APPTg-Blue module, which therefore constitutes a core pathobiological response to A $\beta$  onto which genetic risk for sporadic AD converges. These 439 risk genes encompass 18 well established AD genes, i.e. *Abi3*, *ApoE*, *Bin1*, *Clu*, *Def8*, *Epha1*, *Fcer1g*, *Fermt2*, *H2-Ab1* (HLA-DQA in humans), *Inpp5d*, *Plcg2*, *Prss36*, *Rin3*, *Siglech* (*CD33* in humans), *Spi1*, *Tomm40*, *Trem2* and *Zcwpw1*. The 421 other genes in this data set have been associated to AD with decreasing degrees of statistical certainty. When taking gene sets with increasingly stringent p-values for their association to AD risk, the number of GWAS genes in the selection obviously drops (Supplementary Table 2), but the genetic evidence for the role of these genes in AD increases. In the end the choice of p-value threshold is arbitrary, as even SNPs with p-values up to 0.5 contribute to the PRS and therefore contain information.<sup>6</sup> The important insight is, however, that identified genes are implied in AD by two independent unbiased experimental approaches: genetically, by contributing to the risk of AD in human studies, and functionally, by being part of the APPTg-Blue-response module in a mouse model for AD.<sup>2,6</sup> We focus here on GWAS genes that have been associated to AD with  $p < 0.001$ , that are present in the APPTg-Blue module, and that are, additionally, significantly differentially expressed in the age\*genotype comparison of APPTg mice (see Fig.3E). The latter criterion is restrictive because we require that the gene is not only part of the APPTg-Blue response module but is also significantly altered in expression, thus likely part of the core response that defines the module. We identified 18 genes in this stringent intersection which is

markedly better than expected by chance alone (expected 2.2 genes,  $p_{adj}=6.5e-11$ , Fig.3E and Supplementary Table 7). These 18 genes are *APOE*, *CLU*, *GPC2*, *INPP5D*, *CD33*, *PLCG2*, *TREML2*, *SPI1*, *FCER1G*, *SYK*, *GRN*, *SLC2A5*, *SAMSN1*, *PYDC1*, *HEXB*, *RRBP1*, *LYN* and *BLNK* (Fig.5). The full set of GWAS genes with  $p<0.5$  in the APPtg-Blue module and significantly differentially expressed ( $n=263$  genes) are listed in Supplementary Table 6.

Among these 18 genes we find 7 established AD GWAS genes, i.e. *APOE*, *CLU*, *INPP5D* (aka Ship1), *CD33* (*Siglech* in mouse), *PLCG2*, *SPI1* and *FCER1G*.<sup>3,4,32</sup> Among the other 11, *SYK*, *LYN* and *BLNK*, together with *INPP5D*, *FCER1G* and *PLCG2*, play a role in FC-gamma receptor mediated phagocytosis (see also Fig.5). When examining the longer list of priority GWAS genes (see Supplementary Table 6), we can find more members of this pathway, including *TREM2*, *ITGAM* and *VAV1*. Moreover, the same genes, as well as others of the top-18 list, i.e. *PYDC1/PYCARD* (orthologous to the mouse gene *Pycard*), *GRN*, *SLC2A5*, and others of the extended list, i.e. *ITGAX*, *PTPRC*, *LAPTM5*, *SAMSN1* and *ARHGAP30*, are all part of the 'immune and microglia' module regulated by *TYROBP* inferred by Zhang et al. from RNAseq data derived from LOAD patients.<sup>30</sup> Other microglia- and lysosome-related genes are *TREML2* and *HEXB*. All of the 18 AD risk genes are predicted Spi1 targets according to i-cisTarget (see Fig.4C) and 11 out of these (*APOE*, *BLNK*, *HEXB*, *INPP5D*, *LYN*, *PLCG2*, *RRBP1*, *SAMSN1*, *SLC2A5*, *SPI1*, *SYK*) are demonstrated targets in a ChIPseq experiment in the BV2 microglia cell line.<sup>33</sup> Thus many of these subthreshold AD risk genes that contribute to polygenic inheritance, participate in microglia-related functional networks both in AD patients as well as in mouse models of A $\beta$  pathology. We calculated the average expression of each gene within each cell type for the top 18 genes, using the data compiled by Zeisel et al., which demonstrated that the top 18 genes are highly expressed in microglia (~4 times more than average, see Fig.4A).<sup>15</sup> Thus, these top 18 GWAS genes contribute to the cellular response of microglia when facing increasing A $\beta$  levels. The possible role of these genes together with other microglia-related previously established GWAS genes is schematically summarized in Fig.5, and further discussed below.

## Discussion

This study identifies a gene transcription module (APPtg-Blue) that is specifically induced by overexpression of mutated *APP/PSEN1* (but not by *MAPT*) and is enriched for a large set of genes that were previously linked with SNPs associated to AD risk without reaching genome-wide significance. Our experiments suggest that these genes are part of a pathway that characterizes the microglia response to A $\beta$  (see Fig.5). While the individual effects of various SNPs on expression of these genes are likely small and biological insignificant, the combination of hundreds of such subtle alterations, if synergic in one pathway, might veer the cellular response to A $\beta$  in a disease causing direction through biological epistasis.<sup>34</sup> Our data do not allow determining whether this gene deregulation is damaging or protective, but they put the identified genes in a co-regulation network that is highly relevant to AD.

Functionally, this co-regulatory network (the APPtg-Blue module), represents a vast neuroinflammatory response involving interneurons, astroglia and, overwhelmingly, microglia. These observations considerably expand previous work, strengthening the hypothesis that the major response in brain to A $\beta$  pathology is neuroinflammation.<sup>35,36</sup> Our and other data suggest that an early and profound neuroinflammatory response is an integral and perhaps even driving component in AD pathogenesis, and that A $\beta$  is sufficient to induce this neuroinflammatory reaction.<sup>30,36</sup> Our data strengthen this concept considerably by demonstrating that a large part of the GWAS-based genetic risk affects genes that are expressed in the molecular pathway defining this neuroinflammatory response to A $\beta$  pathology.

Earlier studies have relied heavily on functional analysis and module connectivity for putative gene selection involved in AD pathogenesis, but whether these genes were also differentially expressed was not considered<sup>29,30,36</sup>. The 5 recently reported novel AD risk genes *OAS1*, *ITGAM*, *CXCL10*, *LAPTM5* and *LILRB4* are all found within the APPtg-Blue module, but only *Itgam* and *Laptm5* are significantly differentially expressed with increasing A $\beta$  load.<sup>29</sup> We used two independent functional criteria: genes must have a genetic association with AD at  $p < 0.001$  and show a statistically significant change in

expression when exposed to increasing levels of A $\beta$  over time, indicating that these genes are part of the cellular response. By using two independent criteria to assign significance to the identified genes, we can predict with high confidence (BY-padj=6.5e-11) that they are indeed involved in a disease pathway responding to A $\beta$  pathology.

Among the prioritized SNPs, many are linked to known myeloid-expressed genes involved in innate immune pathways (see Fig.5). Briefly, *FCER1G* encodes for the gamma subunit of IgE-specific Fc receptors and plays a role in phagocytosis and microglial activation.<sup>37</sup> *SYK* is recruited by *FCER1G* and *TYROBP* (DAP-12) upon activation of *TREM2*, whereas *LYN* is localized at the plasma membrane and mediates *TREM2/SYK* phosphorylation.<sup>38,39</sup> *BLNK* is a target of *SYK* and mediates the recruitment of *PLCG2*.<sup>39</sup> *TREML2*, unlike *TREM2*, is reported to activate microglia and promote release of pro-inflammatory cytokines.<sup>40</sup> *PYCD1* (*Pycard* in mouse) encodes for apoptosis-associated speck-like protein containing C-terminal caspase recruitment domain (ASC), a core component of the inflammasome complex, and has been recently linked to seeding and spreading of A $\beta$  in mouse models of AD.<sup>41</sup> The lysosomal protein *HEXB* and glucose transporter *SLC2A5* are part of the microgliome profile.<sup>42</sup> *GRN* can adopt multiple subcellular localizations from lysosomes (as granulin) to the extracellular space (as progranulin) and exerts a negative control upon microglial activation in mouse models (see Fig.5).<sup>43</sup> Interestingly, all of the prioritized AD risk genes are *Spi1* targets, substantiating the pivotal role of this transcription factor in the observed A $\beta$ -induced transcriptional response.<sup>31,44</sup>

It remains to be clarified where, when and how in this pathway TAU pathology starts and how it contributes to disease progression towards dementia, and whether A $\beta$  directly, or indirectly by the broad and complex neuroinflammatory (APPtg-Blue) response, induces abnormal TAU phosphorylation or conformation. Our hypothesis implies, however, that TAU pathology comes downstream of the microglia/neuroinflammatory response on A $\beta$  because GWAS-defined genetic risk for AD is not associated with TAU-induced gene expression changes. The TAUtg transcriptional analysis does suggest that TAU induces very early down-regulation of neuronal genes (Supplementary Fig.S2), which vibes with the observations that dementia correlates much better with the appearance of



tangles than amyloid plaques. Besides its role in regulating immune response, the newly prioritized risk gene *Syk* is a known tau kinase, providing an interesting genetic link between A $\beta$  and TAU pathology.<sup>45</sup>

In conclusion, we hypothesize that the transition from a rather asymptomatic biochemical or prodromal phase, to the clinical, symptomatic, phase in AD, is largely determined by the combined inheritance of low-penetrant SNPs, which, as our work suggests, might affect the gene expression in the APPTg-Blue module. Such hypothesis also provides an explanation for the conundrum that some patients with high A $\beta$  burden succumb without clinical symptoms. While A $\beta$  might be the trigger of the disease, it is the genetic make-up of the microglia (and possibly other cell types) which determines whether a pathological response is induced.

## Acknowledgements

We thank Veronique Hendrickx and Jonas Verwaeren for animal husbandry, and Carlo Sala Frigerio and Tom Jaspers for discussions. APPTg mice were a kind gift from Mathias Jucker, DZNE, Germany. Annerieke Sierksma and Bart De Strooper are supported by the Opening the Future campaign of the Leuven Universitair Fonds (LUF) and the Alzheimer Research Foundation (SAO-FRA; P#16017). Evgenia Salta is an FWO and Alzheimer's Association postdoctoral fellow. Work in the De Strooper laboratory was supported by the Fonds voor Wetenschappelijk Onderzoek (FWO), KU Leuven, VIB, and a Methusalem grant from KU Leuven and the Flemish Government, Vlaams Initiatief voor Netwerken voor Dementie Onderzoek (VIND, Strategic Basic Research Grant 135043) and the "Geneeskundige Stichting Koningin Elisabeth". Bart De Strooper is holder of the Bax-Vanluffelen Chair for Alzheimer's Disease. Luc Buée is supported by grant ANR-16-COEN-0007.

## Author Contributions

A.S., B.D.S. and M.F. designed the study and wrote the manuscript. A.S., A.L., J.Z. and M.F. performed analyses. D.B. and L.B. provided TAUtg mice. E.S., R.M., D.B. and L.B. provided expertise and feedback. All authors read and approved the final manuscript for publication.

## Declaration of Interests

B.D.S. is ad hoc consultant for various companies but has no direct financial interest in the current study. L.B. is consultant for Servier and Remynd. He receives research funding from UCB Pharma, but not for the work presented in the current manuscript. A.S., A.L., E.S., R.M., J.Z., D.B. and M.F. report no biomedical financial interests or potential conflicts of interest.

## References

- 1 Gatz M, Reynolds C a, Fratiglioni L, *et al.* Role of genes and environments for explaining Alzheimer's disease. *Arch Gen Psychiatry* 2006; **63**: 168–74.
- 2 Marioni RE, Harris SE, McRae AF, *et al.* GWAS on family history of Alzheimer's disease. *Transl Psychiatry* 2018; **8**: 99.
- 3 Efthymiou AG, Goate AM. Late onset Alzheimer's disease genetics implicates microglial pathways in disease risk. *Mol Neurodegener* 2017; **12**: 43.
- 4 Verheijen J, Sleegers K. Understanding Alzheimer Disease at the Interface between Genetics and Transcriptomics. *Trends Genet* 2018; **34**: 434–47.
- 5 Purcell SM, Wray NR, Stone JL, *et al.* Common polygenic variation contributes to risk of schizophrenia and bipolar disorder. *Nature* 2009; **460**: 748–52.
- 6 Escott-Price V, Myers AJ, Huentelman M, Hardy J. Polygenic risk score analysis of pathologically confirmed Alzheimer disease. *Ann Neurol* 2017; **82**: 311–4.
- 7 De Strooper B, Karran E. The Cellular Phase of Alzheimer's Disease. *Cell* 2016; **164**: 603–15.
- 8 Zahs KR, Ashe KH. 'Too much good news' – are Alzheimer mouse models trying to tell us how to prevent, not cure, Alzheimer's disease? *Trends Neurosci* 2010; **33**: 381–9.
- 9 Radde R, Bolmont T, Kaeser S a, *et al.* Abeta42-driven cerebral amyloidosis in transgenic mice reveals early and robust pathology. *EMBO Rep* 2006; **7**: 940–6.
- 10 Schindowski K, Bretteville A, Leroy K, *et al.* Alzheimer's disease-like tau neuropathology leads to memory deficits and loss of functional synapses in a novel mutated tau transgenic mouse without any motor deficits. *Am J Pathol* 2006; **169**: 599–616.
- 11 Sierksma A, Lu A, Salta E, *et al.* Deregulation of neuronal miRNAs induced by amyloid- $\beta$  or TAU pathology. *Mol Neurodegener* 2018; **13**: 54.
- 12 Trapnell C, Pachter L, Salzberg SL. TopHat: discovering splice junctions with RNA-Seq. *Bioinformatics* 2009; **25**: 1105–11.
- 13 Ritchie ME, Phipson B, Wu D, *et al.* limma powers differential expression analyses for RNA-

- sequencing and microarray studies. *Nucleic Acids Res* 2015; **43**: e47-.
- 14 Benjamini Y, Yekutieli D. THE CONTROL OF THE FALSE DISCOVERY RATE IN MULTIPLE TESTING UNDER DEPENDENCY. 2001  
[https://projecteuclid.org/download/pdf\\_1/euclid.aos/1013699998](https://projecteuclid.org/download/pdf_1/euclid.aos/1013699998) (accessed Oct 30, 2018).
- 15 Zeisel A, Machado ABM, Codeluppi S, *et al.* Cell types in the mouse cortex and hippocampus revealed by single-cell RNA-seq. *Science* (80- ) 2015; published online Feb 19. DOI:10.1126/science.aaa1934.
- 16 Zerbino DR, Achuthan P, Akanni W, *et al.* Ensembl 2018. *Nucleic Acids Res* 2018; **46**: D754–61.
- 17 Subramanian A, Tamayo P, Mootha VK, *et al.* Gene set enrichment analysis: a knowledge-based approach for interpreting genome-wide expression profiles. *Proc Natl Acad Sci U S A* 2005; **102**: 15545–50.
- 18 Mootha VK, Lindgren CM, Eriksson K-F, *et al.* PGC-1alpha-responsive genes involved in oxidative phosphorylation are coordinately downregulated in human diabetes. *Nat Genet* 2003; **34**: 267–73.
- 19 Langfelder P, Horvath S. WGCNA: an R package for weighted correlation network analysis. *BMC Bioinformatics* 2008; **9**: 559.
- 20 Langfelder P, Zhang B, Horvath S. Defining clusters from a hierarchical cluster tree: the Dynamic Tree Cut package for R. *Bioinformatics* 2008; **24**: 719–20.
- 21 Eden E, Navon R, Steinfeld I, Lipson D, Yakhini Z. GOrilla: a tool for discovery and visualization of enriched GO terms in ranked gene lists. *BMC Bioinformatics* 2009; **10**: 48.
- 22 Huang DW, Sherman BT, Lempicki RA. Systematic and integrative analysis of large gene lists using DAVID bioinformatics resources. *Nat. Protoc.* 2009; **4**: 44–57.
- 23 Huang DW, Sherman BT, Lempicki RA. Bioinformatics enrichment tools: paths toward the comprehensive functional analysis of large gene lists. *Nucleic Acids Res* 2009; **37**: 1–13.
- 24 Imrichová H, Hulselmans G, Kalender Atak Z, *et al.* i-cisTarget 2015 update: generalized cis-regulatory enrichment analysis in human, mouse and fly. *Nucleic Acids Res* 2015; **43**: W57–64.

- 25 Wang M, Zhao Y, Zhang B. Efficient Test and Visualization of Multi-Set Intersections. *Sci Rep* 2015; **5**: 16923.
- 26 Liao Y, Smyth GK, Shi W. featureCounts: an efficient general purpose program for assigning sequence reads to genomic features. *Bioinformatics* 2014; **30**: 923–30.
- 27 Ritchie ME, Phipson B, Wu D, *et al.* limma powers differential expression analyses for RNA-sequencing and microarray studies. *Nucleic Acids Res* 2015; **43**: e47–e47.
- 28 Lo AC, Iscru E, Blum D, *et al.* Amyloid and tau neuropathology differentially affect prefrontal synaptic plasticity and cognitive performance in mouse models of Alzheimer’s disease. *J Alzheimer’s Dis* 2013; **37**: 109–25.
- 29 Salih DA, Bayram S, Guelfi MS, *et al.* Genetic variability in response to A $\beta$  deposition influences Alzheimer’s risk. *bioRxiv* 2018; published online Jan 1. DOI:10.1101/437657.
- 30 Zhang B, Gaiteri C, Bodea L-GG, *et al.* Integrated systems approach identifies genetic nodes and networks in late-onset Alzheimer’s disease. *Cell* 2013; **153**: 707–20.
- 31 Huang K, Marcora E, Pimenova AA, *et al.* A common haplotype lowers PU.1 expression in myeloid cells and delays onset of Alzheimer’s disease. *Nat Neurosci* 2017; published online June 19. DOI:10.1038/nn.4587.
- 32 Taguchi K, Yamagata HD, Zhong W, *et al.* Identification of hippocampus-related candidate genes for Alzheimer’s disease. *Ann Neurol* 2005; **57**: 585–8.
- 33 Satoh J, Asahina N, Kitano S, Kino Y. A Comprehensive Profile of ChIP-Seq-Based PU.1/Spi1 Target Genes in Microglia. *Gene Regul Syst Bio* 2014; **8**: GRSB.S19711.
- 34 Moore JH, Williams SM. Traversing the conceptual divide between biological and statistical epistasis: systems biology and a more modern synthesis. *BioEssays* 2005; **27**: 637–46.
- 35 Wirz KTS, Bossers K, Stargardt A, *et al.* Cortical beta amyloid protein triggers an immune response, but no synaptic changes in the APP<sup>swe</sup>/PS1<sup>dE9</sup> Alzheimer’s disease mouse model. *Neurobiol Aging* 2013; **34**: 1328–42.
- 36 Matarin M, Salih DA, Yasvoina M, *et al.* A Genome-wide gene-expression analysis and database

- in transgenic mice during development of amyloid or tau pathology. *Cell Rep* 2015; **10**: 633–45.
- 37 Nimmerjahn F, Ravetch J V. Fcγ receptors as regulators of immune responses. *Nat Rev Immunol* 2008; **8**: 34–47.
- 38 Konishi H, Kiyama H. Microglial TREM2/DAP12 Signaling: A Double-Edged Sword in Neural Diseases. *Front Cell Neurosci* 2018; **12**: 206.
- 39 Kipps TJ, Stevenson FK, Wu CJ, *et al.* Chronic lymphocytic leukaemia. *Nat Rev Dis Prim* 2017; **3**: 16096.
- 40 Zheng H, Liu C-C, Atagi Y, *et al.* Opposing roles of the triggering receptor expressed on myeloid cells 2 and triggering receptor expressed on myeloid cells-like transcript 2 in microglia activation. *Neurobiol Aging* 2016; **42**: 132–41.
- 41 Venegas C, Kumar S, Franklin BS, *et al.* Microglia-derived ASC specks cross-seed amyloid-β in Alzheimer’s disease. *Nature* 2017; **552**: 355–61.
- 42 Butovsky O, Jedrychowski MP, Moore CS, *et al.* Identification of a unique TGF-β – dependent molecular and functional signature in microglia. 2014; **17**. DOI:10.1038/nn.3599.
- 43 Martens LH, Zhang J, Barmada SJ, *et al.* Progranulin deficiency promotes neuroinflammation and neuron loss following toxin-induced injury. *J Clin Invest* 2012; **122**: 3955–9.
- 44 Gjoneska E, Pfenning AR, Mathys H, *et al.* Conserved epigenomic signals in mice and humans reveal immune basis of Alzheimer’s disease. *Nature* 2015; **518**: 365–9.
- 45 Paris D, Ait-Ghezala G, Bachmeier C, *et al.* The spleen tyrosine kinase (Syk) regulates Alzheimer amyloid-β production and Tau hyperphosphorylation. *J Biol Chem* 2014; **289**: 33927–44.

## Figures and Figure Legends

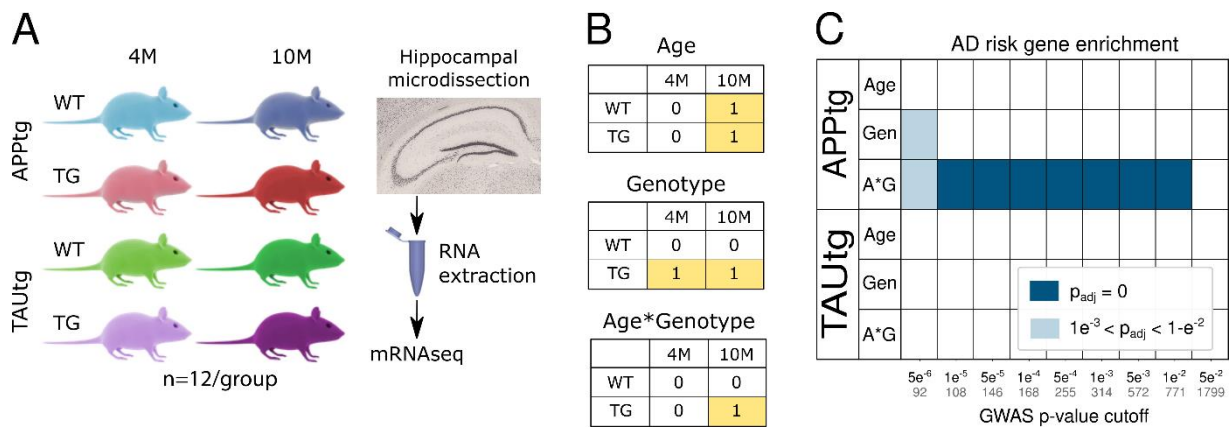

**Fig.1: Enrichment of AD risk genes in APPtg and not in TAUtg mice.** A) Experimental design for mRNA sequencing using n=12 per experimental group. B) Explanation of the 2x2 linear model, where those cells labeled with 1 are compared to the cells labeled with 0. In the age comparison, mRNA expression in all 10 month old (10M) mice is compared to all 4 month old (4M) mice. In the genotype comparison, mRNA expression in all transgenic (TG) mice is compared to all wild-type (WT) mice. In the age\*genotype comparison, we assess which transcripts are differentially expressed in the 10M TG mice compared to all other groups. C) Based on Marioni et al<sup>2</sup> various sets of AD GWAS risk genes were created using different cut-off p-values indicated on the x-axis (number of genes within each set is written in grey). Enrichment for AD risk genes was assessed among the different statistical comparisons for APPtg and TAUtg mice (Int: age\*genotype, Gen: genotype). Colors represent  $-\log_{10}(\text{Benjamini-Yuketieli adjusted p-value})$  for the enrichment; blank means no significant enrichment.

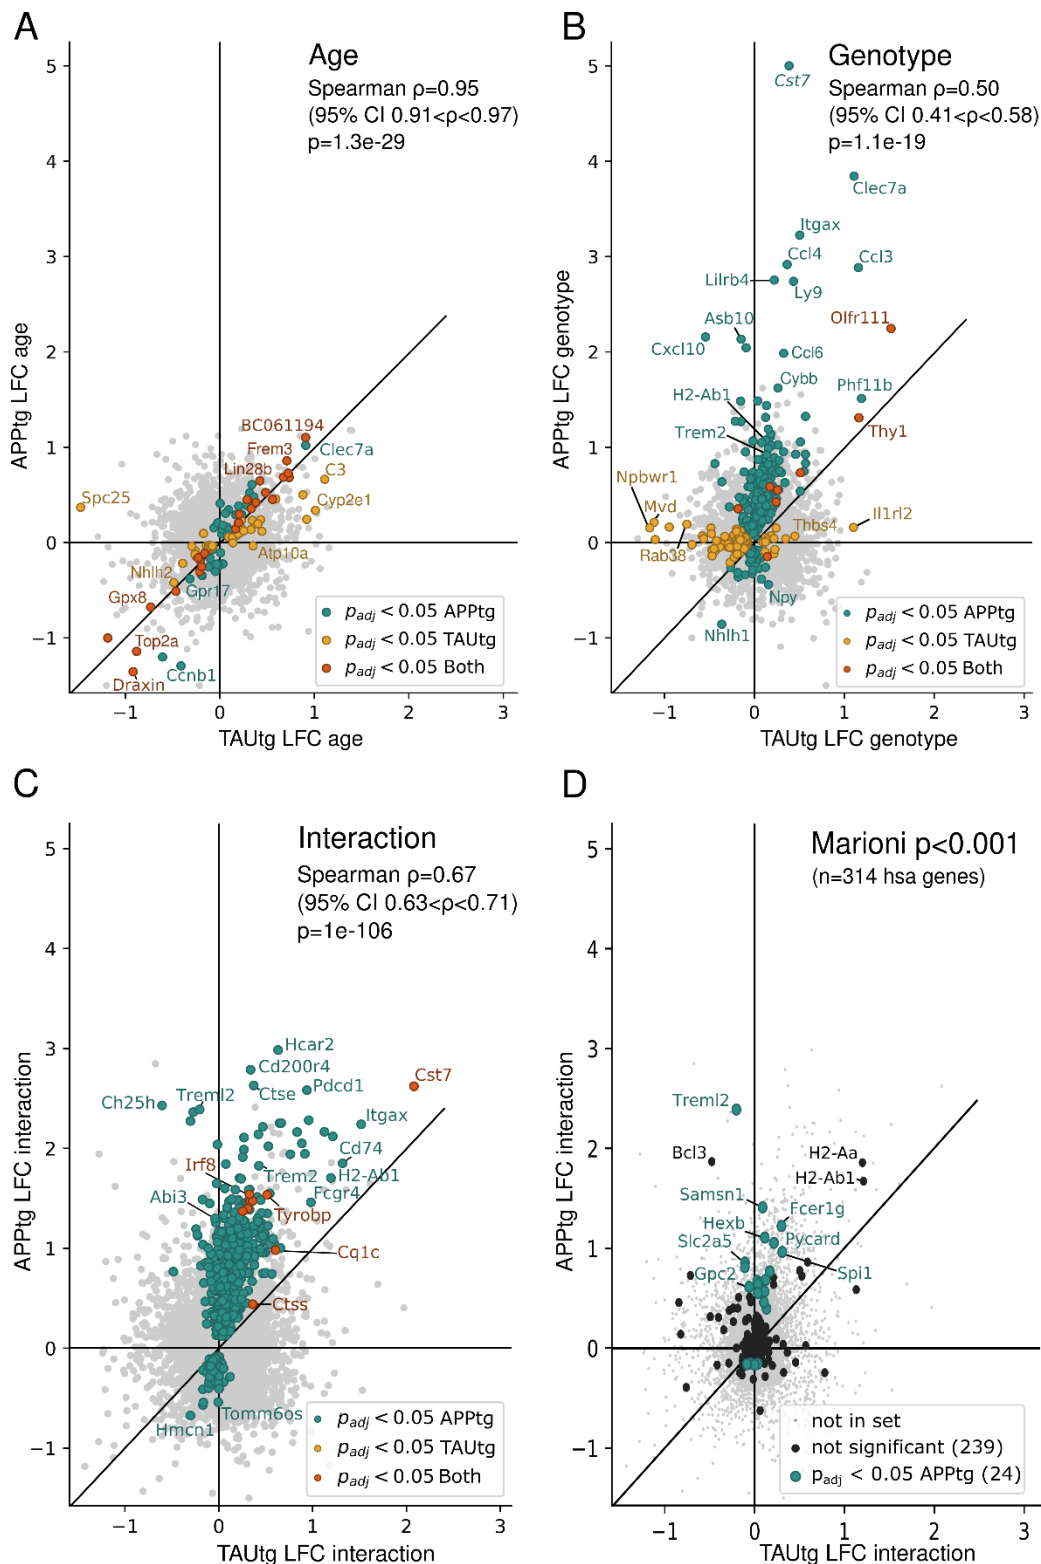

**Fig.2: Changes in gene expression exacerbate with aging in APptg but not in TAUtg mice.** Log2 fold change (LFC) in TAUtg (x-axis) and APptg mice (y-axis) after differential expression analysis, assessing



the effects of age (A), genotype (B) and age\*genotype interaction and where in D only the Marioni-based GWAS genes at  $p < 0.001$  are depicted. Colored dots represent significantly differentially expressed genes (Benjamini-Yuketieli-adjusted p-values ( $P_{adj}$ )  $< 0.05$ ) for APPTg (green dots), TAUtg (yellow dots) or for both (red dots). Spearman correlation assesses the correlation between APPTg and TAUtg mice when ranking genes that are significantly differentially expressed in either APPTg or TAUtg mice from most up- to most down-regulated on a combined score of LFC and  $P_{adj}$  (i.e. signed  $\log_{10}(p\text{-value})$ , where the sign is determined by the LFC). Black dots in D represent all GWAS genes with  $p < 0.001$ .

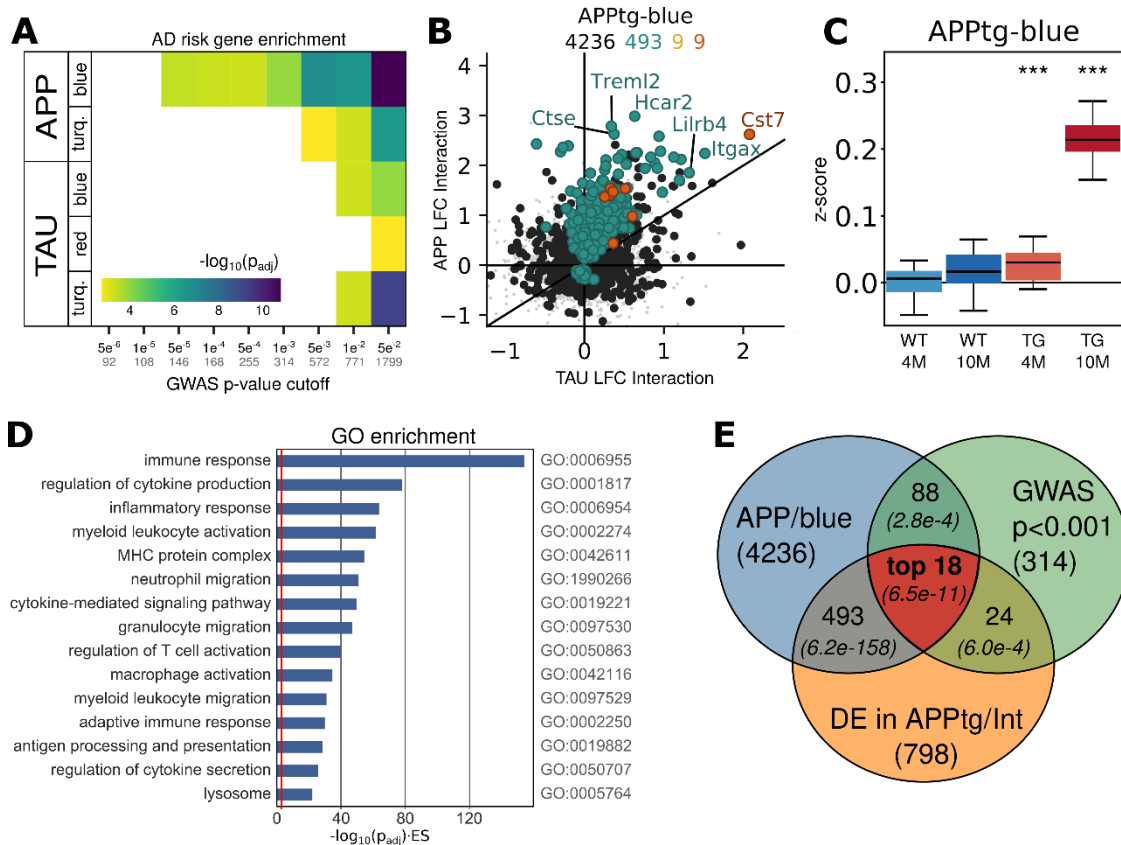

**Fig.3: The APPTg-Blue module represents a coordinated transcriptional response only present in APPTg mice.** A) Gene set enrichment analysis of GWAS genes from Marioni et al.<sup>2</sup> at different p-value cut-offs among the WGCNA-derived modules in APPTg or TAUtg mice (see also Supplementary Fig.S3+4). Colors represent  $-\log_{10}(\text{Benjamini-Yuketieli adjusted } p\text{-value})$  for the enrichment. Numbers on the x-axis: black = p-value cut-off; grey = size of GWAS gene set. B) Log2 fold change (LFC) in TAUtg (x-axis) and APPTg mice (y-axis) after differential expression analysis, assessing the effects of age\*genotype interaction. Color code for dots/numbers: grey = genes in hippocampus (n=15824); black = genes in APPTg-Blue (n=4236); green = genes significantly differentially expressed in APPTg mice (n=493); yellow = significantly differentially expressed genes in TAUtg mice (n=9); red = significantly differentially expressed genes in both (n=9). C) Z-score distribution per experimental group for all genes within the APPTg-Blue module. Boxplots: center line, median; box limits, 25<sup>th</sup>-75<sup>th</sup> quartiles; whiskers, 1.5x interquartile range. Empirical p-values are Bonferroni adjusted ( $p_{bonf} < 0.001$ ) and

indicate significant shift in z-score distribution (see Supplementary Materials & Methods). D) Gene Ontology (GO) enrichment for genes within the APPTg-Blue module. The x-axis depicts  $-\log_{10}(\text{FDR-adjusted p-value})$  multiplied by the enrichment score (ES), where the red line represents an  $-\log_{10}(0.049) * (\text{ES}=1)$ . E) The “top 18” GWAS genes are prioritized by finding the intersection of genes within the APPTg-Blue module ( $n=4236$ ), AD GWAS genes with  $p < 0.001$  in Marioni et al.<sup>2</sup> ( $n=314$ ) and significantly differentially expressed genes in the age\*genotype comparison of APPTg mice ( $n=798$ ).

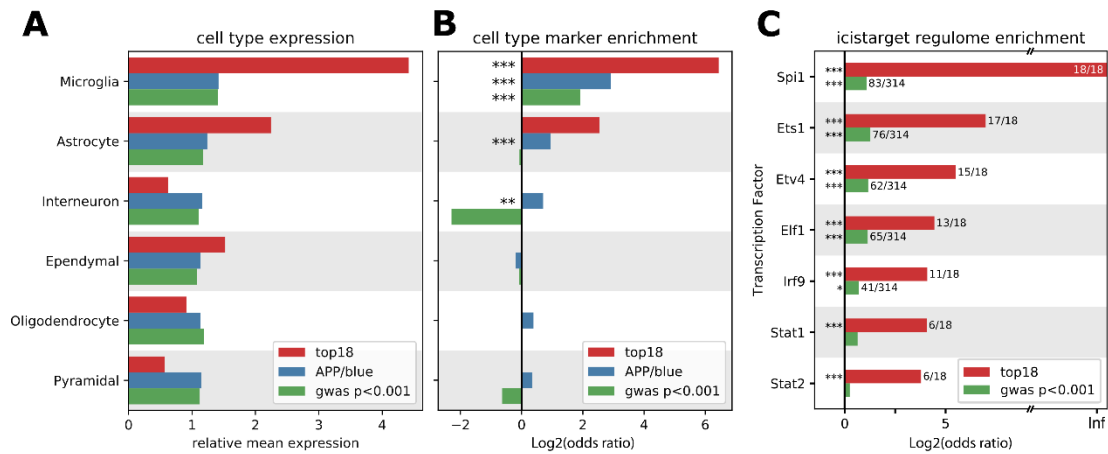

**Fig.4: “Top 18” genes are expressed in microglia and regulated by *Spi1*.** A, B) Average expression of genes within all cell types (A) and enrichment of the cell type marker genes as determined by Zeisel et al.<sup>15</sup> (B) among the ‘top 18’ genes (red bars) as defined in Fig.3E, the genes within the APptg-Blue module (blue bars) and GWAS genes with  $p < 0.001$  ( $^2$ ; green bars). C) Enrichment of transcription factor targets among the ‘top 18’ genes (red bars) and the GWAS genes with  $p < 0.001$  (green bars). \*\*\*: significant enrichment,  $p < 0.001$ ; \*\*:  $p < 0.01$ . \*:  $p < 0.05$ . P-values are Benjamini-Yuketieli-adjusted, except for (C) where they are empirical and Bonferroni-adjusted.

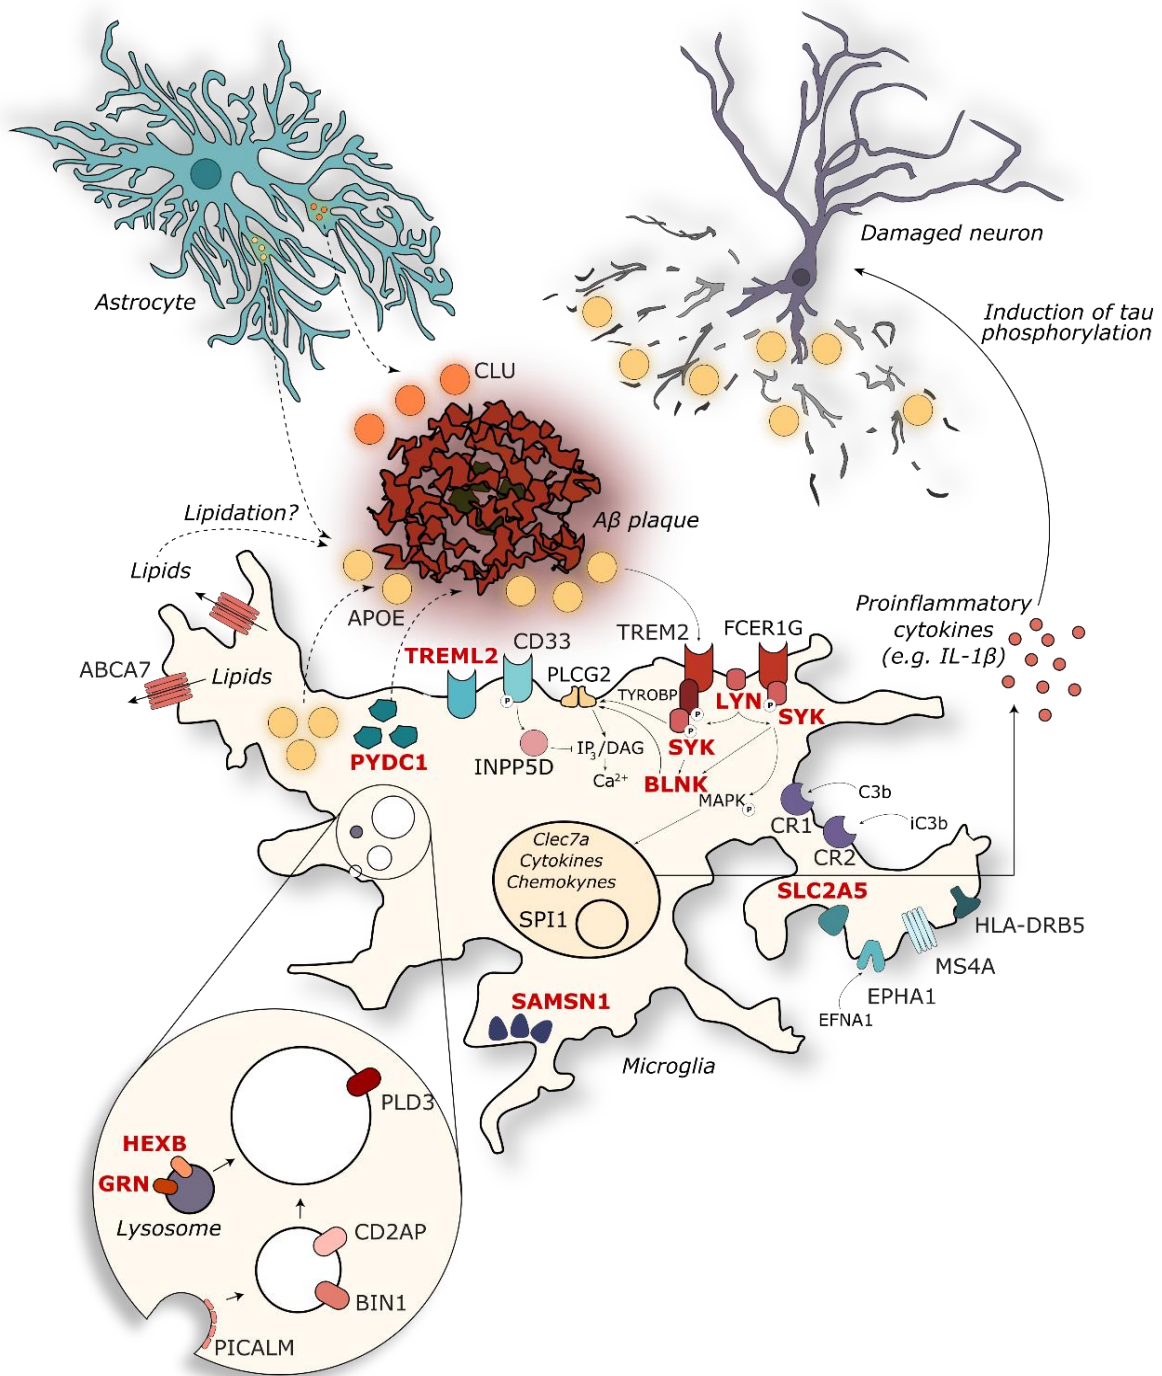

**Fig.5: The 11 novel prioritized AD risk genes mainly cluster together with other established AD genes within microglial or lysosomal gene networks involving innate immunity.** Genes are depicted in their known cellular components, with previously described established GWAS<sup>3,4</sup> in black, and the prioritized novel genes (this paper) in red. See discussion section for further functional annotation and references.

## Overview of Supplementary Material

### 1. Supplementary Figures:

1. Supplementary Fig.S1: Two APPTg-O mice have lower transgene expression.
2. Supplementary Fig.S2: APPTg and TAUtg mice demonstrate divergent neuronal and glial responses to increasing pathology load.
3. Supplementary Fig.S3: Overview of APPTg-based WGCNA modules.
4. Supplementary Fig.S4: Overview of TAUtg-based WGCNA modules.
5. Supplementary Fig.S5: Examples of the mean z-score distribution of 10,000 randomly sampled gene sets with equal sizes to the gene set of interest.

### 2. Supplementary Materials & Methods

### 3. Supplementary Tables (separate Excel file; available upon request)

1. Supplementary Table 1: Overview of the differential expression analysis per gene.
2. Supplementary Table 2: Overview of the number of Marioni-based GWAS genes at different p-value cutoffs
3. Supplementary Table 3: Overlap between genes within a WGCNA module and the cell-type specific gene sets.
4. Supplementary Table 4: GOrilla-based GO enrichment per WGCNA module
5. Supplementary Table 5: DAVID-based functional enrichment per WGCNA module
6. Supplementary Table 6: Overview of all GWAS genes with  $p < 0.5$  that are significantly differentially expressed within the APPTg age\*genotype interaction comparison.
7. Supplementary Table 7: Results from the SuperExactTest for overlaps between multiple gene sets.
